# Supplementary material
Source: PubMed Central journal article supplement (PMC9724860)
Supplement: EIJ-D-19-00774_Stegehuis_SD.pdf [file EIJ-D-19-00774_Stegehuis_SD.pdf]

## Supplementary data

**Supplementary Table 1. Akaike's information criterion selection process for CFR.**

| Number of variables | Included variables                                                                                           | Cp   | R2Adj | AIC   | BIC   | R2    |
|---------------------|--------------------------------------------------------------------------------------------------------------|------|-------|-------|-------|-------|
| 6                   | Age, female gender, history of MI, diastolic blood pressure, RPP, hypercholesterolaemia                      | 3.53 | 0.116 | 870.2 | 898.1 | 0.129 |
| 5                   | Age, female gender, history of MI, diastolic blood pressure, RPP                                             | 3.58 | 0.113 | 870.3 | 894.2 | 0.124 |
| 6                   | Age, female gender, history of MI, diastolic blood pressure, RPP, statin use                                 | 3.62 | 0.115 | 870.3 | 898.2 | 0.129 |
| 7                   | Age, female gender, history of MI, diastolic blood pressure, RPP, statin use, smoking                        | 3.82 | 0.117 | 870.5 | 902.3 | 0.133 |
| 7                   | Age, female gender, history of MI, diastolic blood pressure, RPP, statin use, smoking, hypercholesterolaemia | 3.91 | 0.117 | 870.6 | 902.4 | 0.133 |
| 5                   | Age, female gender, history of MI, RPP, hypercholesterolaemia                                                | 3.95 | 0.112 | 870.7 | 894.6 | 0.124 |
| 4                   | Age, female gender, history of MI, RPP                                                                       | 4.02 | 0.110 | 870.8 | 890.7 | 0.119 |
| 6                   | Age, female gender, history of MI, diastolic blood pressure, RPP, smoking                                    | 4.09 | 0.114 | 870.8 | 898.7 | 0.128 |
| 6                   | Age, female gender, history of MI, RPP, smoking, hypercholesterolaemia                                       | 4.16 | 0.114 | 870.9 | 898.8 | 0.128 |
| 5                   | Age, female gender, diastolic blood pressure, RPP, hypercholesterolaemia                                     | 4.24 | 0.112 | 871.0 | 894.9 | 0.123 |

AIC: Akaike's information criterion; BIC: Bayesian information criterion; CFR: coronary flow reserve; Cp: Mallow's Cp; R2Adj: adjusted R2

**Supplementary Table 2. Akaike's information criterion selection process for CFC.**

| Number of variables | Included variables                                                                                              | Cp   | R2Adj | AIC   | BIC   | R2    |
|---------------------|-----------------------------------------------------------------------------------------------------------------|------|-------|-------|-------|-------|
| 8                   | Age, female gender, history of MI, diabetes, hypertension, RPP, statin use, calcium antagonist use              | 5.53 | 0.051 | 717.7 | 753.5 | 0.070 |
| 7                   | Age, female gender, history of MI, diabetes, hypertension, RPP, calcium antagonist use                          | 5.88 | 0.047 | 718.1 | 750.0 | 0.064 |
| 6                   | Age, history of MI, diabetes, hypertension, RPP, calcium antagonist use                                         | 6.34 | 0.044 | 718.6 | 746.5 | 0.058 |
| 5                   | Age, diabetes, hypertension, RPP, calcium antagonist use                                                        | 6.44 | 0.041 | 718.8 | 742.7 | 0.053 |
| 7                   | Age, history of MI, diabetes, hypertension, RPP, statin use, calcium antagonist use                             | 6.45 | 0.046 | 718.7 | 750.5 | 0.063 |
| 9                   | Age, female gender, history of MI, diabetes, hypertension, RPP, aspirin use, statin use, calcium antagonist use | 6.49 | 0.051 | 718.6 | 758.4 | 0.072 |
| 8                   | Age, female gender, history of MI, diabetes, hypertension, RPP, aspirin use, statin use, calcium antagonist use | 6.61 | 0.048 | 718.8 | 754.6 | 0.067 |
| 6                   | Age, female gender, diabetes, hypertension, RPP, calcium antagonist use                                         | 6.61 | 0.043 | 718.9 | 746.8 | 0.058 |
| 7                   | Age, female gender, history of MI, diabetes, hypertension, statin use, calcium antagonist use                   | 6.76 | 0.045 | 719.0 | 750.9 | 0.062 |
| 6                   | Age, female gender, history of MI, diabetes, statin use, calcium antagonist use                                 | 6.78 | 0.043 | 719.1 | 747.0 | 0.057 |

AIC: Akaike's information criterion; BIC: Bayesian information criterion; CFC: coronary flow capacity; Cp: Mallows's Cp; R2Adj: adjusted R2
